# Supplementary material
Source: PubMed Central journal article supplement (PMC6033307)
Supplement: Supp_Fig2.pdf [file Supp_Fig2.pdf]

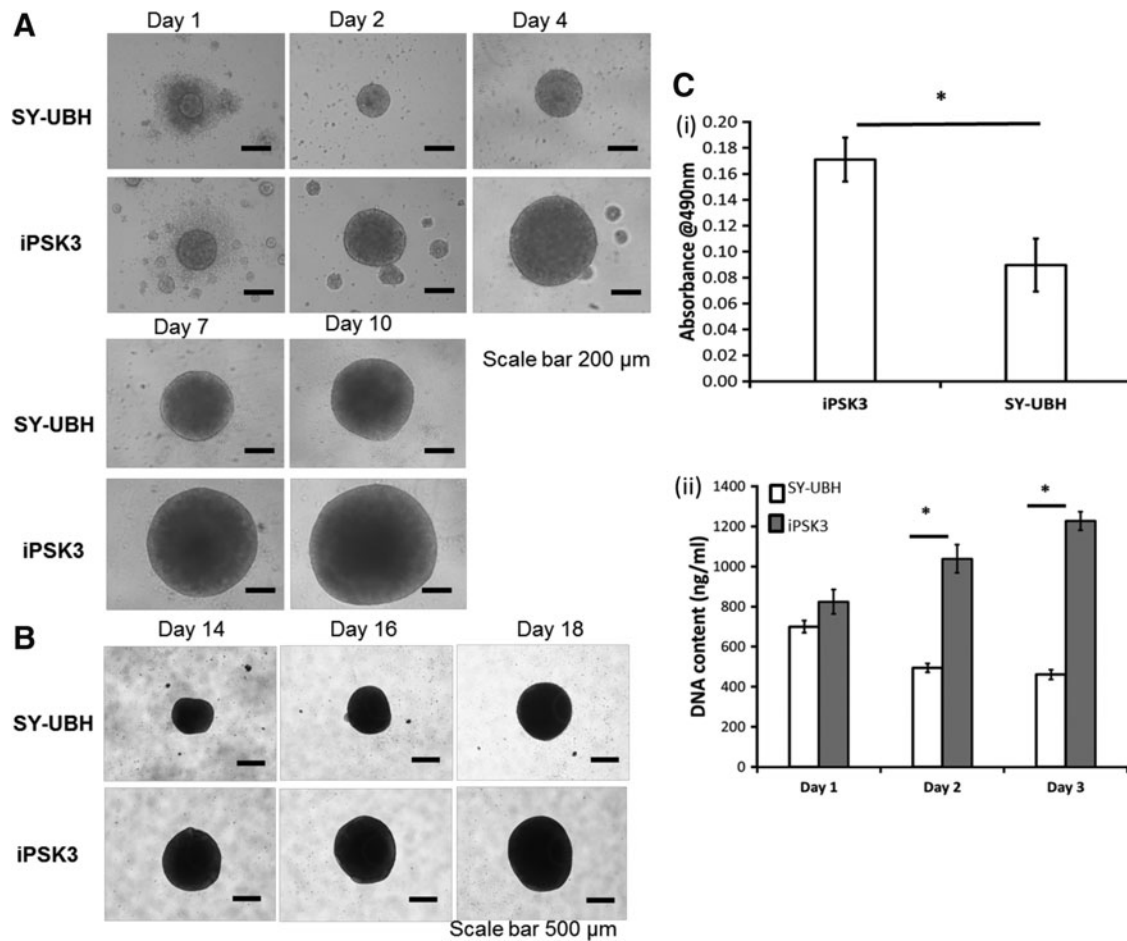

**SUPPLEMENTARY FIG. S2.** Comparison of neural sphere formation between SY-UBH and iPSK3 cell lines. Phase contrast images of spheres from day 1 to 18. To compare aggregate formation, both cell lines were seeded in ULA 96-well plates (Corning, Inc., Corning, NY) at about  $1.0 \times 10^4$  cells per well in 200  $\mu$ L of mTeSR serum-free medium to form aggregates for 2 days. Then the neural differentiation protocol was followed. **(A)** Phase contrast images of spheres from day 1 to 10; the small spheres merged into the biggest sphere during culture. **(B)** Phase contrast images of spheres from day 14 to 18 (at a different scale); **(C)** (i) MTT activity (day 9). (ii) DNA contents of spheroids from 9 wells of 96-well plates.  $*p < 0.05$ . For DNA assay, the aggregates were lysed with 0.1 mg/mL proteinase K (Fisher Scientific, Pittsburgh, PA) at 50°C overnight. The lysates (100  $\mu$ L) were mixed with 100  $\mu$ L of Picogreen (Molecular Probes, Eugene, OR) in a 96-well plate. The plate was incubated for 5 min in the dark and then read on a fluorescent plate reader (FLX800; Bioinstrument, Inc.). ULA, ultra-low attachment.
