# Supplementary material
Source: PubMed Central journal article supplement (PMC6033307)
Supplement: Supp_Fig3.pdf [file Supp_Fig3.pdf]

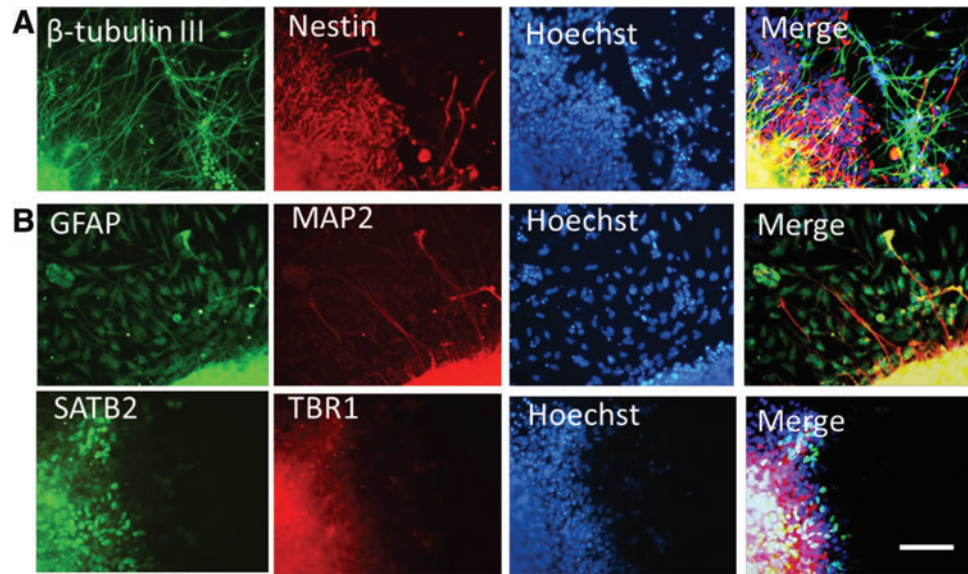

**SUPPLEMENTARY FIG. S3.** Additional neural marker characterization for SY-UBH samples at day 28 and 42. **(A)** Representative fluorescent images of the marker expression:  $\beta$ -tubulin III and Nestin at day 28. **(B)** GFAP, MAP2, SATB2, and TBR1 at day 42. Scale bar: 100  $\mu$ m.
