# Supplementary material
Source: PubMed Central journal article supplement (PMC6033307)
Supplement: Supp_Fig4.pdf [file Supp_Fig4.pdf]

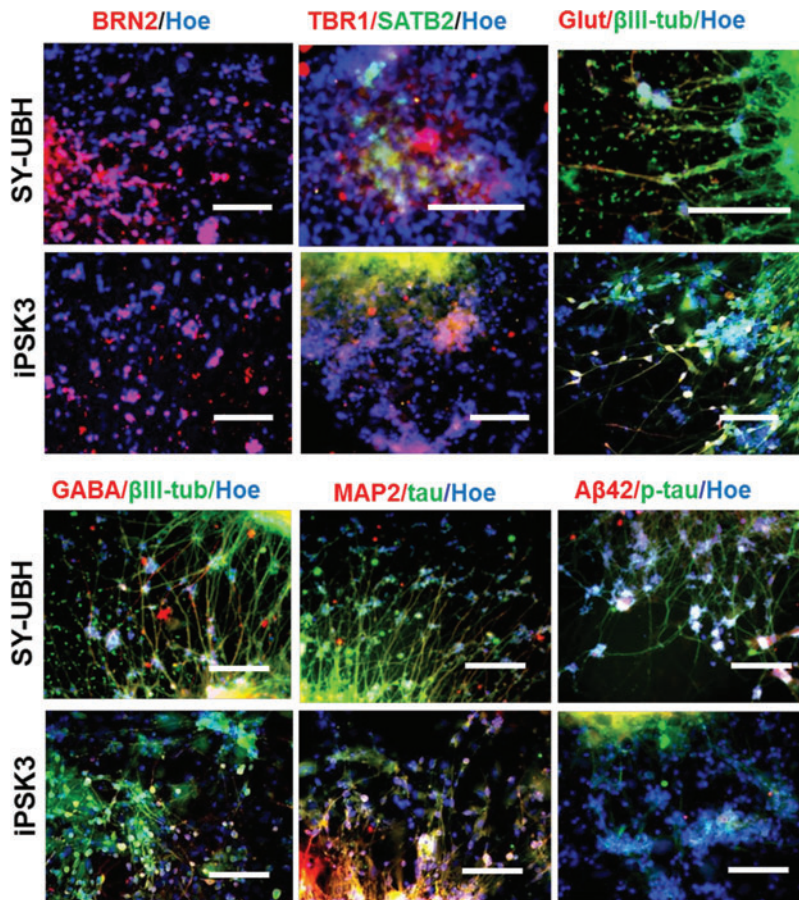

**SUPPLEMENTARY FIG. S4.** Neural markers and A $\beta$ 42 characterization for SY-UBH and iPSK3 samples at day 54. Representative fluorescent images of the marker expression: BRN2, SATB2, TBR1, Glut (glutamate),  $\beta$ III-tub ( $\beta$ -tubulin III), GABA, MAP2, tau, A $\beta$ 42, p-tau. Hoe (Hoechst 33342). Scale bar: 100  $\mu$ m.
