# Supplementary material
Source: PubMed Central journal article supplement (PMC6033307)
Supplement: Supp_Table1.pdf [file Supp_Table1.pdf]

SUPPLEMENTARY TABLE S1. A LIST OF ANTIBODIES

| <i>Cells</i>                      | <i>Primary antibody</i>                     | <i>Origin/isotype</i>  | <i>Supplier/cat#</i>       | <i>Dilution</i> |
|-----------------------------------|---------------------------------------------|------------------------|----------------------------|-----------------|
| Undifferentiated                  | Oct-4                                       | Mouse IgG <sub>1</sub> | Millipore, MAB4419         | 1:500           |
| Three-germ layer                  | Nanog                                       | Rabbit IgG             | Millipore, AB9220          | 1:200           |
|                                   | SOX17                                       | Mouse IgG <sub>1</sub> | Abcam, ab84990             | 1:300           |
| NPC                               | Brachyury                                   | Goat IgG               | R&D Systems, AF2085        | 1:300           |
|                                   | Nestin                                      | Mouse IgG <sub>1</sub> | Abcam, ab18102             | 1:500           |
| Cortical layers                   | Nestin                                      | Rabbit IgG             | Sigma, N5413               | 1:100           |
|                                   | Pax6                                        | Mouse IgG <sub>1</sub> | Santa Cruz, sc-81649       | 1:100           |
| Neurons                           | TBR1 (layer VI)                             | Rabbit IgG             | Abcam, ab31940             | 1:200           |
|                                   | SATB2 (layer IV)                            | Mouse IgG <sub>1</sub> | Abcam, ab51502             | 1:5             |
| Pathway                           | BRN2 (layer III)                            | Goat IgG               | Santa Cruz, sc-6029        | 1:200           |
|                                   | $\beta$ -tubulin III                        | Mouse IgG <sub>1</sub> | Millipore, MAB1637         | 1:200           |
| Synaptic markers                  | Glutamate                                   | Rabbit IgG             | Sigma, G6642               | 1:1000          |
|                                   | GABA                                        | Rabbit IgG             | Sigma, A2052               | 1:1000          |
| Astrocytes                        | MAP2                                        | Rabbit IgG             | Abcam, ab32454             | 1:200           |
|                                   | A $\beta$ 42                                | Rabbit IgG             | Abcam, ab10148             | 1:200           |
| Secondary                         | Tau                                         | Mouse IgG <sub>1</sub> | Sigma, T9450               | 1:100           |
|                                   | Phospho-PHF-tau<br>pSer202+Thr205 (AT8)     | Mouse IgG <sub>1</sub> | Thermal Fisher, MN1020     | 1:200           |
| Secondary for<br>three-germ layer | Synapsin I                                  | Rabbit IgG             | Millipore, 574777          | 1:500           |
|                                   | PSD95                                       | Rabbit IgG             | Life Technologies, 51-6900 | 1:200           |
| Secondary                         | GFAP                                        | Mouse IgG <sub>1</sub> | Millipore, MAB360          | 1:400           |
|                                   | Alexa 488, goat anti-mouse IgG <sub>1</sub> | —                      | Life Technologies, A-21121 | 1:200           |
| Secondary for<br>three-germ layer | Alexa 488, goat anti-rabbit IgG             | —                      | Life Technologies, A-11008 | 1:200           |
|                                   | Alexa 594, goat anti-rabbit IgG             | —                      | Life Technologies, A-11012 | 1:400           |
| Secondary for<br>three-germ layer | Alexa 594, donkey anti-goat IgG             | —                      | Life Technologies, A-11058 | 1:400           |
|                                   | Alexa 568, goat anti-mouse IgG1             | (for Sox17)            | Life Technologies, A-11004 | 1:400           |
| Secondary for<br>three-germ layer | Alexa 568, donkey anti-goat IgG             | (for Brachyury)        | Life Technologies, A-11057 | 1:400           |
|                                   | Alexa 488, goat anti-mouse IgG              | (for Nestin)           | Life Technologies, A-11001 | 1:200           |

NPC, neural progenitor cells.
