# Supplementary material
Source: PubMed Central journal article supplement (PMC6033307)
Supplement: Supp_Table2.pdf [file Supp_Table2.pdf]

SUPPLEMENTARY TABLE S2. PRIMER SEQUENCE FOR TARGET GENES

| <i>Gene</i>    | <i>Forward primer 5' to 3'</i>     | <i>Reverse primer 5' to 3'</i>     |
|----------------|------------------------------------|------------------------------------|
| TBR1           | CCCCCTCGTCTTTCTCTTACC              | TAATGTGGAGGCCGAGACTTG              |
| vGluT1         | CCCCAATTCTCGCACTTTAT               | GGGAAGGATCCCAGATTTGA               |
| MMP2           | CATCGCTCAGATCCGTGGTG               | GCATCAATCTTTTCCGGGAGC              |
| MMP3           | CCATCTCTTCCTTCAGGCGT               | ATGCCTCTTGGGTATCCAGC               |
| SDC3           | CTGGGAGTTGCCATCTGAGAG              | CCACGCTGCCTACGAAAAATA              |
| TNF- $\alpha$  | CCTGGGATTCAGGAATGTGTG              | TGTAGGCCCCAGTGAGTTCTG              |
| IL-6           | ATGAGGAGACTTGCCTGGTGA              | ATCTGCACAGCTCTGGCTTGT              |
| hOct3/4        | GAC AGG GGG AGG GGA GGA GCT AGG    | CTT CCC TCC AAC CAG TTG CCC CAA AC |
| hSox2          | GGG AAA TGG GAG GGG TGC AAA AGA GG | TTG CGT GAG TGT GGA TGG GAT TGG TG |
| Nanog          | CCC CGA TTC TTC CAC CAG TCC C      | CGG AAG ATT CCC AGT CGG GTT CAC C  |
| Rex1           | CAG ATC CTA AAC AGC TCG CAG AAT    | GCG TAC GCA AAT TAA AGT CCA GA     |
| $\beta$ -actin | GTACTCCGTGTGGATCGGCG               | AAGCATTTGCGGTGGACGATGG             |

IL, interleukin; MMP, matrix metalloproteinase; TNF, tumor necrosis factor.
